# Supplementary material for: Interferon gamma peptidomimetic targeted to interstitial myofibroblasts attenuates renal fibrosis after unilateral ureteral obstruction in mice
Source: PubMed Central journal article supplement (PMC5342338; doi:10.18632/oncotarget.11095), 2016-08-05
Supplement: oncotarget-07-54240-s001.pdf [file oncotarget-07-54240-s001.pdf]

# Interferon gamma peptidomimetic targeted to interstitial myofibroblasts attenuates renal fibrosis after unilateral ureteral obstruction in mice

Supplementary Material

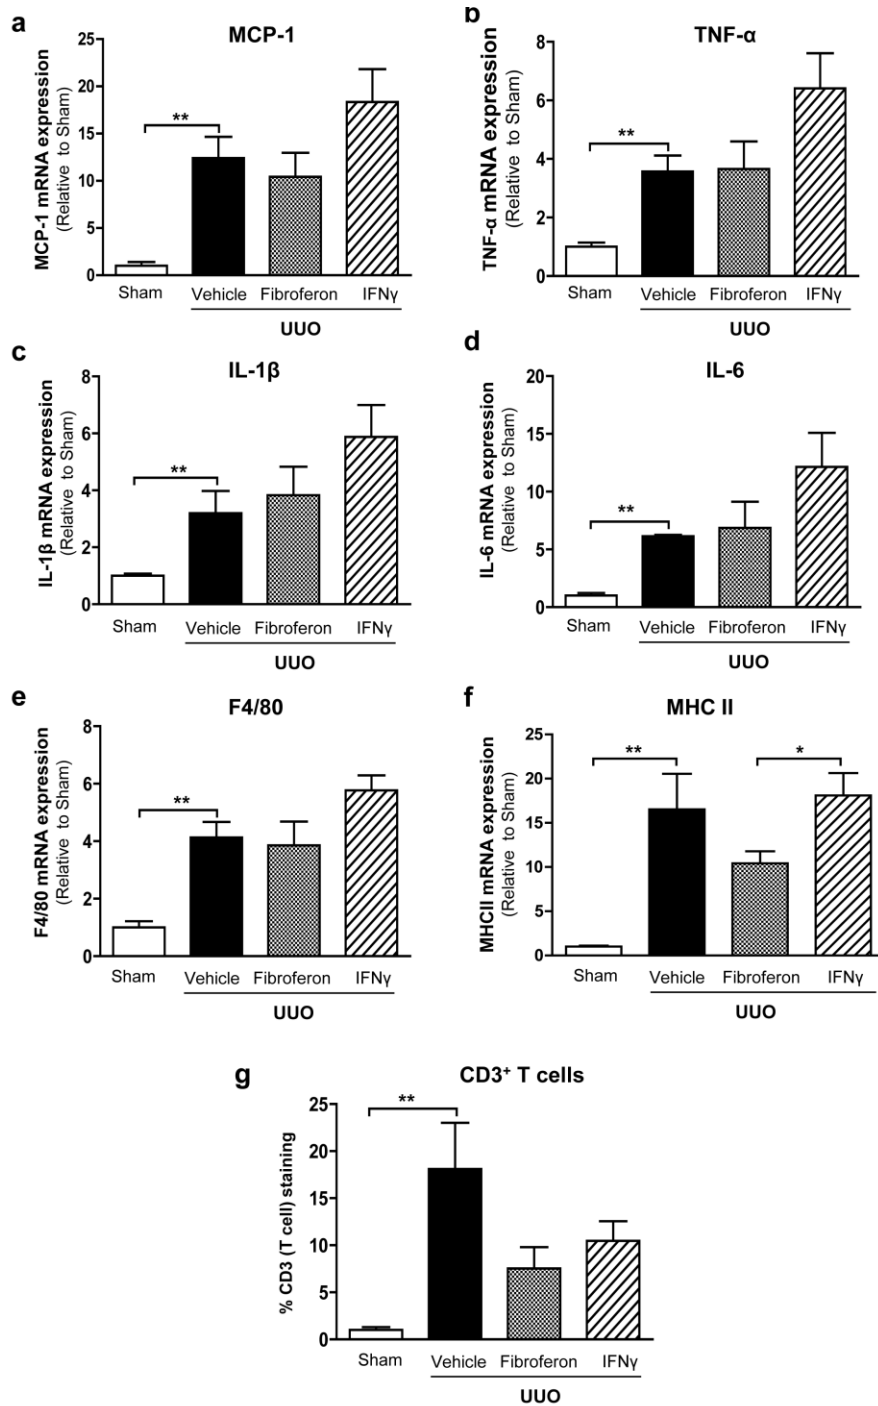

**Supplemental Figure 1.** UUU induces renal inflammation which is non-significantly reduced by Fibroferon. Relative gene expression of (a) MCP-1, (b) TNF- $\alpha$ , (c) IL-1 $\beta$ , (d) IL-6, (e) F4/80 and (f) MHC II. Computerized quantitative analysis of CD3 (T cells) immunohistochemistry on sham-operated and UUU kidneys treated with vehicle (PBS), Fibroferon, or (non-targeted full length) IFN $\gamma$  (g). Analyses were performed 7 days post surgery. Quantitative data of UUU are expressed relative to sham. \*\*p<0.01, \*p<0.05. Bars represent mean  $\pm$  SEM of 5-6 mice per group.
